# Supplementary material
Source: publisher figshare collection journal article supplement (https://frontiersin.figshare.com/ndownloader/files/21493923)
Supplement: Supplementary file 1 [file 21493923]

## Sheet: Supp Table 3
Supplemental Table 3: Hydroperiod data for observed, NSM 4.6.2, bias-adjusted 4.6.2, and paleo-adjusted NSM, for each station.
	Count data are number of days water is above ground for each year. Data are averaged across period of record to produce average above ground water days shown in text Table 2.
P33 Hydroperiod data						NP206 Hydroperiod data						EVER4 Hydroperiod data
	Paleo-adj NSM	Bias-adj NSM	NSM	Observed			Paleo-adj NSM	Bias-adj NSM	NSM	Observed			Paleo-adj NSM	Bias-adj NSM	NSM	Observed
year	count	count	count	count		year	count	count	count	count		year	count	count	count	count
1965	365	365	365	256		1975	276	260	269	0		1994	365	217	232	343
1966	365	365	365	365		1976	326	297	309	47		1995	365	365	365	288
1967	365	365	365	328		1977	302	220	287	31		1996	361	287	290	287
1968	366	366	366	359		1978	365	354	365	53		1997	317	267	269	256
1969	365	365	365	365		1979	365	362	365	57		1998	343	254	260	347
1970	365	365	365	365		1980	366	366	367	35		1999	302	254	258	265
1971	358	252	250	306		1981	226	206	221	93		2000	324	217	229	299
1972	366	366	366	364		1982	311	290	300	201
1973	365	365	365	342		1983	365	365	365	243		Average	340	266	272	298
1974	365	342	342	294		1984	366	366	366	116
1975	365	365	365	365		1985	257	222	234	83
1976	366	366	366	364		1986	365	365	365	81
1977	365	365	365	361		1987	365	322	353	88
1978	365	365	365	365		1988	316	299	309	140
1979	365	365	365	365		1989	62	17	39	0
1980	366	366	366	358		1990	112	33	80	0
1981	365	319	318	365		1991	228	226	226	121
1982	365	365	365	365		1992	366	350	359	0
1983	365	365	365	258		1993	365	365	365	70
1984	366	366	366	333		1994	365	365	365	130
1985	365	365	365	349		1995	365	365	365	315
1986	365	365	365	365		1996	366	366	366	232
1987	365	365	365	365		1997	365	365	365	211
1988	366	366	366	324		1998	365	365	365	227
1989	324	303	301	299		1999	365	365	365	244
1990	253	200	200	255		2000	366	362	366	199
1991	365	365	365	350
1992	366	366	366	246		Average	318	302	312	*
1993	365	365	365	361
1994	365	365	365	341				Observed broken down for NP206:
1995	365	365	365	364					*Aver. with 0 yrs included	116
1996	366	366	366	358					*Aver. with 0 yrs removed	137
1997	365	365	365	321					count<100	10
1998	365	365	365	364					count >100	12
1999	365	365	365	365					count > 200	7
2000	366	366	366	366					count >300	1
									Max	315
Average	361	354	354	340
